# Supplementary material for: Structural, spectroscopic, and computational evaluations of cation–cation and halogen bonding interactions in heterometallic uranyl hybrid materials
Source: Royal Society of Chemistry journal article supplement (doi:10.1039/d0qi01319f), 2020-12-10
Supplement: d0qi01319f1.pdf [file d0qi01319f1.pdf]

## **Structural, Spectroscopic, and Computational Evaluations of Cation-Cation and Halogen Bonding Interactions in Heterometallic Uranyl Hybrid Materials**

Korey P. Carter<sup>ab</sup>, Mark Kalaj<sup>ac</sup>, Sapphire McNeil<sup>d</sup>, Andrew Kerridge<sup>d</sup>, Mark H. Schofield<sup>a</sup>, J. August Ridenour<sup>a</sup>, and Christopher L. Cahill<sup>\*a</sup>

<sup>a</sup> Department of Chemistry, The George Washington University, 800 22<sup>nd</sup> Street, NW, Washington, D.C. 20052, United States

<sup>b</sup> Chemical Sciences Division, Lawrence Berkeley National Laboratory, Berkeley, CA 94720, United States

<sup>c</sup> Department of Chemistry and Biochemistry, University of California, San Diego, La Jolla, CA 92093, United States

<sup>d</sup> Department of Chemistry, Lancaster University, Bailrigg, Lancaster LA1 4YB, United Kingdom

*E-mail:* cahill@gwu.edu

### **Supporting Info Section**

|                                              |           |
|----------------------------------------------|-----------|
| <b>I. Additional Figures and Tables</b>      | <b>2</b>  |
| <b>II. Powder X-ray Diffraction data</b>     | <b>13</b> |
| <b>III. Thermal Ellipsoid Plots</b>          | <b>15</b> |
| <b>IV. Tables of Bond Distances</b>          | <b>17</b> |
| <b>V. DFT Computed Structure Coordinates</b> | <b>19</b> |
| <b>VI. References</b>                        | <b>30</b> |

## I. Additional Figures and Tables

**Table S1** Crystallographic Data for **1-4**

|                                                | <b>1</b>                                                                                                     | <b>2</b>                                                          | <b>3</b>                                                          | <b>4</b>                                                         |
|------------------------------------------------|--------------------------------------------------------------------------------------------------------------|-------------------------------------------------------------------|-------------------------------------------------------------------|------------------------------------------------------------------|
| chem formula                                   | C <sub>28</sub> H <sub>16</sub> I <sub>4</sub> N <sub>2</sub> O <sub>18</sub> Ag <sub>2</sub> U <sub>2</sub> | C <sub>21</sub> H <sub>12</sub> I <sub>3</sub> O <sub>8</sub> AgU | C <sub>21</sub> H <sub>12</sub> I <sub>3</sub> O <sub>8</sub> AgU | C <sub>21</sub> H <sub>9</sub> I <sub>6</sub> O <sub>8</sub> AgU |
| formula weight                                 | 1867.83                                                                                                      | 1118.91                                                           | 1118.91                                                           | 1496.58                                                          |
| crystal system                                 | triclinic                                                                                                    | triclinic                                                         | monoclinic                                                        | triclinic                                                        |
| space group                                    | P-1                                                                                                          | P-1                                                               | P2 <sub>1</sub> /n                                                | P-1                                                              |
| <i>a</i> (Å)                                   | 8.8109(4)                                                                                                    | 8.677(7)                                                          | 9.1545(5)                                                         | 11.210(7)                                                        |
| <i>b</i> (Å)                                   | 11.4713(6)                                                                                                   | 9.815(8)                                                          | 14.2946(7)                                                        | 12.407(8)                                                        |
| <i>c</i> (Å)                                   | 11.4852(6)                                                                                                   | 15.0560(11)                                                       | 19.4243(10)                                                       | 23.0870(11)                                                      |
| $\alpha$ (deg)                                 | 117.072(4)                                                                                                   | 97.859(6)                                                         | 90                                                                | 77.655(6)                                                        |
| $\beta$ (deg)                                  | 106.043(3)                                                                                                   | 98.971(7)                                                         | 93.878(11)                                                        | 82.316(6)                                                        |
| $\gamma$ (deg)                                 | 91.445(3)                                                                                                    | 101.625(7)                                                        | 90                                                                | 74.954(7)                                                        |
| <i>V</i> (Å <sup>3</sup> )                     | 977.81(9)                                                                                                    | 1221.7(14)                                                        | 2536.0(2)                                                         | 3019.0(3)                                                        |
| <i>Z</i>                                       | 1                                                                                                            | 2                                                                 | 4                                                                 | 4                                                                |
| <i>T</i> (K)                                   | 293(2)                                                                                                       | 293(2)                                                            | 293(2)                                                            | 293(2)                                                           |
| $\lambda$ (Mo K $\alpha$ )                     | 0.71073                                                                                                      | 0.71073                                                           | 0.71073                                                           | 0.71073                                                          |
| <i>D</i> <sub>calc</sub> (g cm <sup>-3</sup> ) | 3.172                                                                                                        | 3.042                                                             | 2.931                                                             | 3.293                                                            |
| $\mu$ (mm <sup>-1</sup> )                      | 12.476                                                                                                       | 11.256                                                            | 10.845                                                            | 12.183                                                           |
| <i>R</i> <sub>int</sub>                        | 0.0297                                                                                                       | 0.0662                                                            | 0.0421                                                            | 0.0332                                                           |
| R1 [ <i>I</i> > 2 $\sigma$ ( <i>I</i> )]       | 0.0384                                                                                                       | 0.0419                                                            | 0.0297                                                            | 0.0387                                                           |
| wR2 [ <i>I</i> > 2 $\sigma$ ( <i>I</i> )]      | 0.0879                                                                                                       | 0.0821                                                            | 0.0720                                                            | 0.0849                                                           |
| CCDC Number                                    | 2038396                                                                                                      | 2038397                                                           | 2038398                                                           | 2038399                                                          |

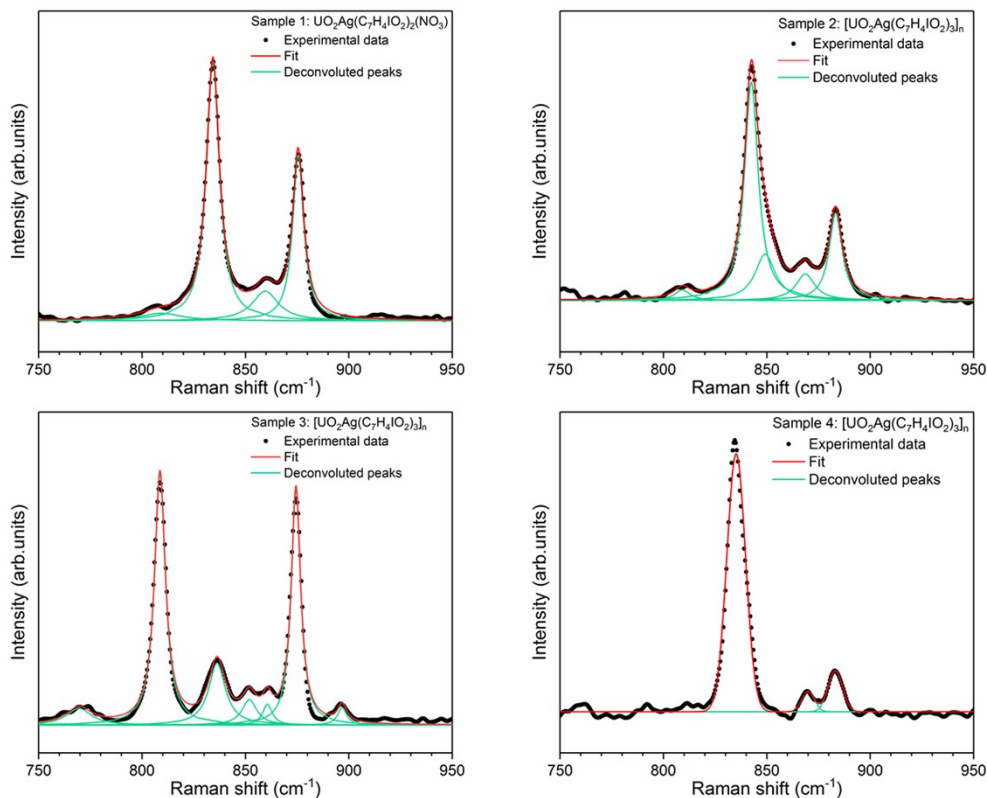

**Figure S1** Deconvolution of Raman spectra of 1-4 for peak identification using Lorentzian curves.<sup>1, 2</sup> From these peak deconvolutions, we were able to extract Raman frequencies and vibrational peak modes, which are highlighted in Figure 9.

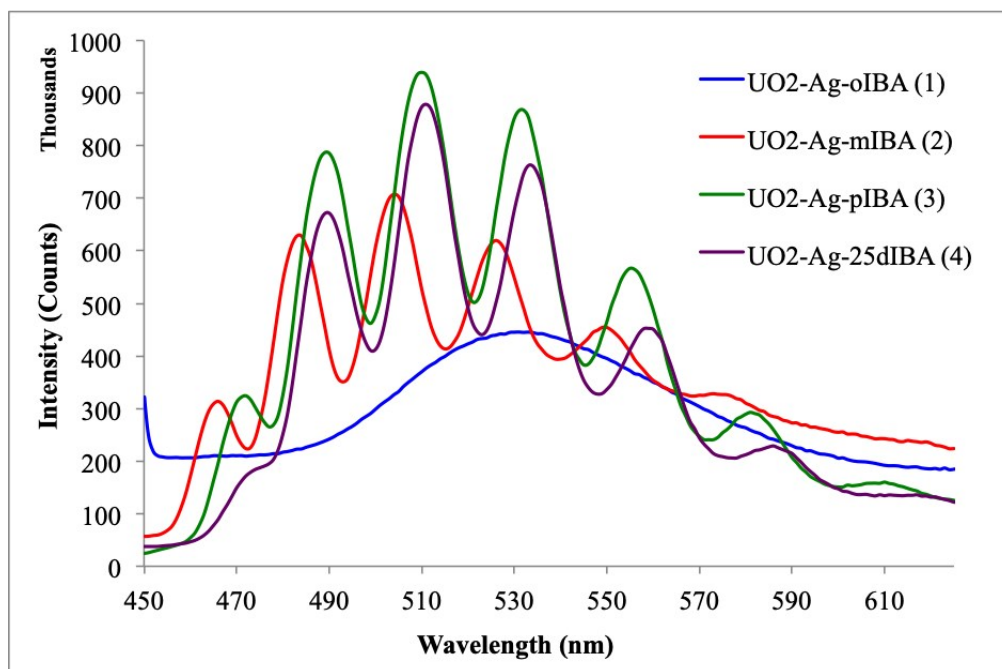

**Figure S2** Room temperature, solid-state emission spectra of 1-4.

**Table S2** Summary of peak positions and vibronic gaps of solid-state emission spectra of **1-4**.

| Compound | Peak Positions from Emission Spectra (nm) | Vibronic Gaps between Emission Spectra Peaks (cm <sup>-1</sup> ) | Average Vibronic Gap (cm <sup>-1</sup> ) |
|----------|-------------------------------------------|------------------------------------------------------------------|------------------------------------------|
| 1        | n/a                                       | n/a                                                              | n/a                                      |
| 2        | 466, 484, 504, 526, 550, 575              | 792, 842, 830, 811, 805                                          | 816                                      |
| 3        | 472, 489, 509, 532, 556, 582, 610         | 761, 813, 827, 805, 819, 798                                     | 804                                      |
| 4        | 474, 490, 510, 559, 587, 620              | 830, 865, 837, 840, 906                                          | 856                                      |

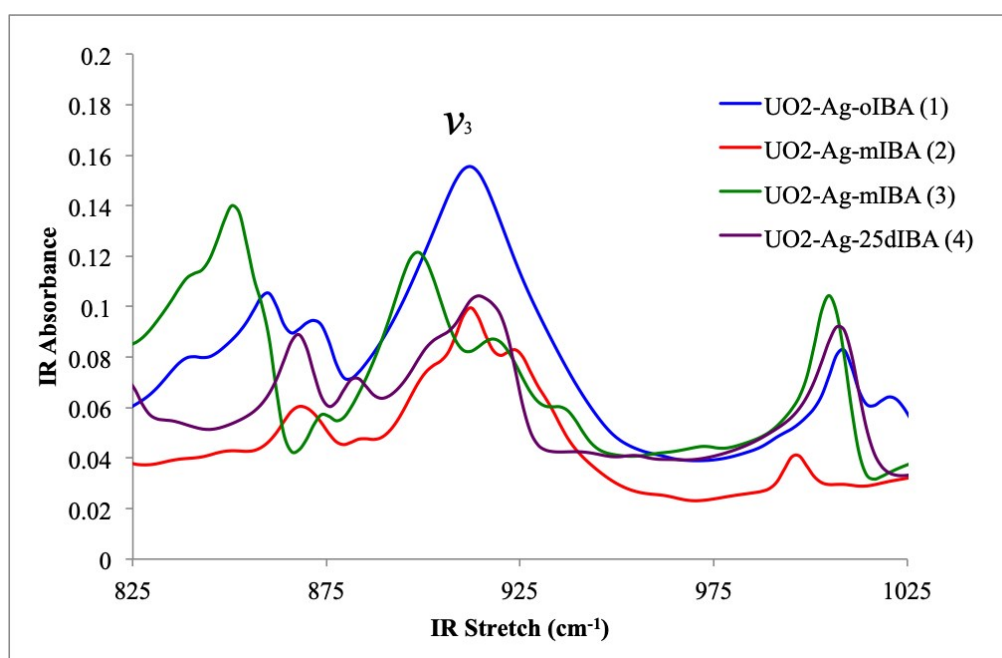**Figure S3** IR spectra of **1-4**. Asymmetric stretch ( $\nu_3$ ) of the uranyl cation is highlighted for each complex.**Table S3** U-O Axial Bond Lengths in **1-4**.

| Compound | $d_{U1-O1}$ [Å] | $d_{U1-O2}$ [Å] | $d_{U2-O3}$ [Å] | $d_{U2-O4}$ [Å] |
|----------|-----------------|-----------------|-----------------|-----------------|
| <b>1</b> | 1.746(7)        | 1.743(7)        |                 |                 |
| <b>2</b> | 1.746(6)        | 1.768(6)        |                 |                 |
| <b>3</b> | 1.772(4)        | 1.793(4)        |                 |                 |
| <b>4</b> | 1.747(6)        | 1.777(5)        | 1.776(5)        | 1.750(6)        |

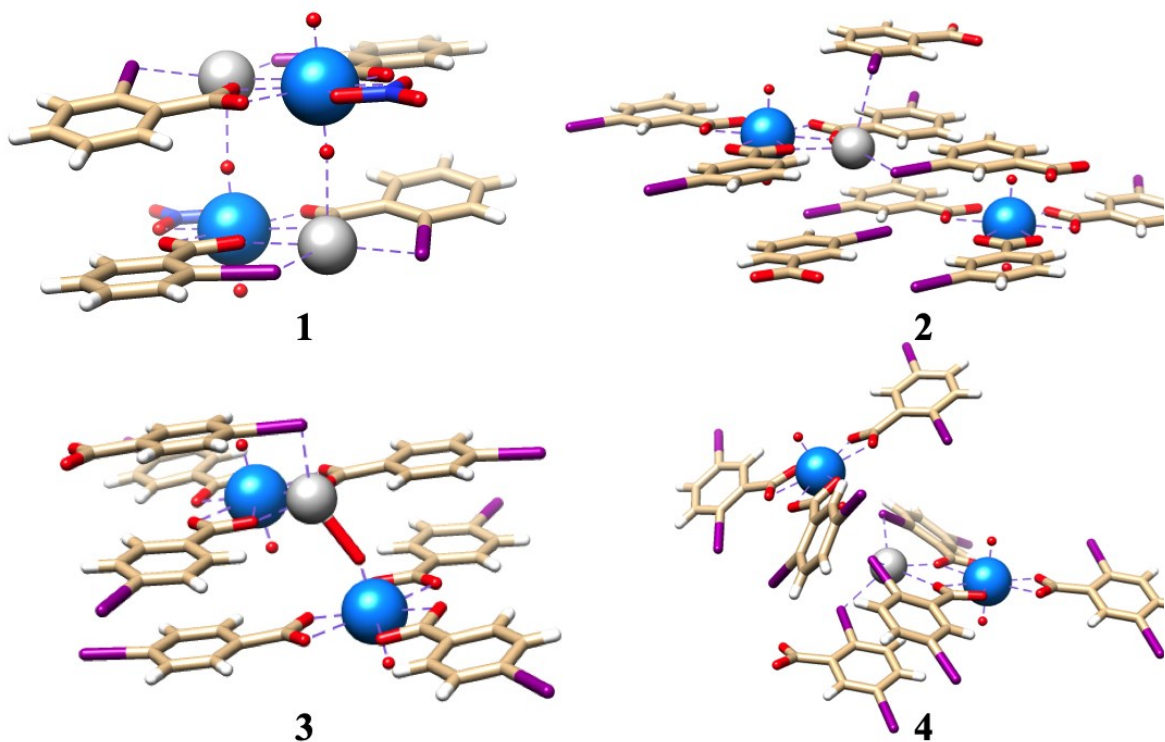

**Figure S4** Model structures of 1-4. Ball and stick representation is indicative of those atoms whose positions were optimized or partially optimized.

**Table S4** Comparison of experimental and DFT calculated values of ( $\nu_1$ ) for 1-4.

| Compound | $\nu$ (cm <sup>-1</sup> ) | Expt. | Notes                                                                |
|----------|---------------------------|-------|----------------------------------------------------------------------|
| 1        | 853                       | 834.5 | Uranyl 1 has greater amplitude                                       |
| 1        | 857                       |       | Uranyl 2 has greater amplitude                                       |
| 2        | 843                       | 842.5 | Localized on uranyl 1                                                |
| 2        | 855                       |       | Localized on uranyl 2 (I coordination, Ag in 2 <sup>nd</sup> sphere) |
| 3        | 765                       | 808.5 | Localized on uranyl 1 (Ag coordinating uranyl O)                     |
| 3        | 796                       |       | Localized on uranyl 2                                                |
| 4        | 837                       | 834.5 | Localized on uranyl 1 (2 x I coordination)                           |
| 4        | 850                       |       | Localized on uranyl 2 (Ag in 2 <sup>nd</sup> coordination sphere)    |

**Table S5** Comparison of experimental and DFT calculated values of ( $\nu_3$ ) for 1-4.

| Compound | $\nu$ (cm <sup>-1</sup> ) | Expt. | Notes                                                                |
|----------|---------------------------|-------|----------------------------------------------------------------------|
| 1        | 916                       | 912   | Uranyl 2 has greater amplitude                                       |
| 1        | 920                       |       | Uranyl 1 has greater amplitude                                       |
| 2        | 899                       | 912   | Localized on uranyl 1                                                |
| 2        | 909                       |       | Localized on uranyl 2 (I coordination, Ag in 2 <sup>nd</sup> sphere) |
| 3        | 826                       | 898   | Localized on uranyl 1 (Ag coordinating uranyl O)                     |
| 3        | 860                       |       | Localized on uranyl 2 (coupled to equatorial vibrations)             |
| 3        | 866                       |       | Localized on uranyl 2 (coupled to equatorial vibrations)             |

|   |     |     |                                                                   |
|---|-----|-----|-------------------------------------------------------------------|
| 4 | 892 | 914 | Localized on uranyl 1 (2 x I coordination)                        |
| 4 | 905 |     | Localized on uranyl 2 (Ag in 2 <sup>nd</sup> coordination sphere) |

**Table S6** Natural Energy Decomposition Analysis for monomeric version of **1**, [UO<sub>2</sub>Ag(C<sub>7</sub>H<sub>4</sub>IO<sub>2</sub>)<sub>2</sub>(NO<sub>3</sub>)].

| Ligand               | Bond Length (Å) | Electrical (kcal/mol) | Charge Transfer (kcal/mol) | Core (kcal/mol) | Total Energy (kcal/mol) |
|----------------------|-----------------|-----------------------|----------------------------|-----------------|-------------------------|
| Ag <sup>+</sup>      | n/a             | -185.25               | -94.51                     | 134.11          | -145.66                 |
| <i>o</i> -IBA, aver. | 2.726984        | -66.47                | -141.79                    | 227.08          | 18.82                   |
| O <sup>2-</sup>      | 1.733555        | -337.19               | -746.89                    | 939.15          | -144.94                 |

**Table S7** Wiberg bond index for selected bonds in **1**.

| Group           | Bond   | Bond Index |
|-----------------|--------|------------|
| UO <sub>2</sub> | U1-O1  | 2.0791     |
| UO <sub>2</sub> | U1-O2  | 1.9961     |
| U-benzoate      | U1-O3  | 0.3839     |
| U-benzoate      | U1-O4  | 0.4075     |
| U-benzoate      | U1-O7  | 0.4051     |
| U-benzoate      | U1-O8  | 0.3782     |
| U-nitrate       | U1-O5  | 0.3834     |
| U-nitrate       | U1-O6  | 0.3793     |
| Ag              | Ag1-O2 | 0.0517     |
| Ag              | Ag1-I1 | 0.2224     |
| Ag              | Ag1-I2 | 0.2383     |
| Ag              | Ag1-O3 | 0.0316     |
| Ag              | Ag1-O8 | 0.0402     |

**Table S8** Wiberg bond index for selected bonds in **2**.

| Group           | Bond   | Bond Index |
|-----------------|--------|------------|
| UO <sub>2</sub> | U1-O1  | 2.0470     |
| UO <sub>2</sub> | U1-O2  | 2.0499     |
| U-benzoate      | U1-O3  | 0.4202     |
| U-benzoate      | U1-O4  | 0.3424     |
| U-benzoate      | U1-O5  | 0.3599     |
| U-benzoate      | U1-O6  | 0.3876     |
| U-benzoate      | U1-O7  | 0.4007     |
| U-benzoate      | U1-O8  | 0.4067     |
| Ag              | Ag1-I1 | 0.2272     |
| Ag              | Ag1-I3 | 0.1546     |
| Ag              | Ag1-O4 | 0.0554     |
| Ag              | Ag1-O5 | 0.0580     |

**Table S9** Wiberg bond index for selected bonds in **3**.

| <b>Subunit</b>               | <b>Group</b>                          | <b>Bond</b>     | <b>Bond Index</b> |
|------------------------------|---------------------------------------|-----------------|-------------------|
| U(benzoate) <sub>2</sub> -Ag | UO <sub>2</sub>                       | U1-O1           | 2.0465            |
|                              | UO <sub>2</sub>                       | U1-O2           | 2.0447            |
|                              | U-benzoate                            | U1-O3           | 0.4328            |
|                              | U-benzoate                            | U1-O4           | 0.4141            |
|                              | U-benzoate                            | U1-O5           | 0.4006            |
|                              | U-benzoate                            | U1-O6           | 0.3728            |
|                              | U-benzoate                            | U1-O7           | 0.3928            |
|                              | U-benzoate                            | U1-O8           | 0.3963            |
|                              | Ag                                    | Ag1-O2          | 0.0766            |
|                              | Ag                                    | Ag1-O6          | 0.0502            |
|                              | Ag                                    | Ag1-O7          | 0.0443            |
|                              | Ag                                    | Ag1-I1          | 0.2428            |
|                              | U(benzoate) <sub>3</sub> <sup>-</sup> | UO <sub>2</sub> | U1-O1             |
| UO <sub>2</sub>              |                                       | U1-O2           | 1.9087            |
| U-benzoate                   |                                       | U1-O3           | 0.4133            |
| U-benzoate                   |                                       | U1-O4           | 0.4105            |
| U-benzoate                   |                                       | U1-O5           | 0.4080            |
| U-benzoate                   |                                       | U1-O6           | 0.4354            |
| U-benzoate                   |                                       | U1-O7           | 0.4330            |
| U-benzoate                   |                                       | U1-O8           | 0.4156            |

**Table S10** Wiberg bond index for selected bonds in **4**.

| <b>Subunit</b>                         | <b>Group</b>    | <b>Bond</b> | <b>Bond Index</b> |
|----------------------------------------|-----------------|-------------|-------------------|
| U(benzoate) <sub>2</sub> -Ag           | UO <sub>2</sub> | U1-O1       | 2.067             |
|                                        | UO <sub>2</sub> | U1-O2       | 2.057             |
|                                        | U-benzoate      | U1-O5       | 0.4133            |
|                                        | U-benzoate      | U1-O6       | 0.3934            |
|                                        | U-benzoate      | U1-O7       | 0.3825            |
|                                        | U-benzoate      | U1-O8       | 0.3967            |
|                                        | U-benzoate      | U1-O9       | 0.3417            |
|                                        | U-benzoate      | U1-O10      | 0.3816            |
| AgO <sub>2</sub> I <sub>3</sub> center | Ag              | Ag1-O8      | 0.0306            |
|                                        | Ag              | Ag1-O9      | 0.0515            |
|                                        | Ag              | Ag1-I1      | 0.2182            |
|                                        | Ag              | Ag1-I3      | 0.1620            |
|                                        | Ag              | Ag1-I5      | 0.1604            |
| UO <sub>2</sub> -Ag                    | UO <sub>2</sub> | U1-O1       | 2.0671            |
|                                        | UO <sub>2</sub> | U1-O2       | 1.9824            |
|                                        | U-benzoate      | U1-O5       | 0.3909            |
|                                        | U-benzoate      | U1-O6       | 0.3871            |
|                                        | U-benzoate      | U1-O7       | 0.4291            |
|                                        | U-benzoate      | U1-O8       | 0.4131            |
|                                        | U-benzoate      | U1-O9       | 0.3794            |
|                                        | U-benzoate      | U1-O10      | 0.3839            |



**Table S11** Topological parameters of **1**.  $\rho_{\text{BCP}}$  = magnitude of electron density at the bond critical point;  $\nabla^2\rho$  = Laplacian of electron density at the bond critical point;  $\varepsilon$  = deviation from cylindrical symmetry of electron cloud;  $G(\mathbf{r}_b)$  = kinetic energy density of bond or non-covalent interaction;  $V(\mathbf{r}_b)$  = potential energy density of bond or non-covalent interaction;  $\delta_{\text{AB}}$  = delocalization index of bond or non-covalent interaction.

| Atoms  | $\rho_{\text{BCP}}$ | $\nabla^2\rho$ | $\varepsilon$ | $G(\mathbf{r}_b)$ | $V(\mathbf{r}_b)$ | $-V/G$ | $\delta_{\text{AB}}$ |
|--------|---------------------|----------------|---------------|-------------------|-------------------|--------|----------------------|
| U1-O1  | 0.3250              | 0.2944         | 0.0021        | 0.3834            | -0.6932           | 1.8081 | 1.9056               |
| U1-O2  | 0.3242              | 0.3302         | 0.0054        | 0.3915            | -0.7006           | 1.7893 | 1.8346               |
| U1-O3  | 0.0613              | 0.1907         | 0.1451        | 0.0564            | -0.0651           | 1.1548 | 0.3377               |
| U1-O4  | 0.0630              | 0.1936         | 0.1420        | 0.0578            | -0.0672           | 1.1627 | 0.3534               |
| U1-O5  | 0.0572              | 0.1813         | 0.1896        | 0.0525            | -0.0596           | 1.1362 | 0.3064               |
| U1-O6  | 0.0565              | 0.1807         | 0.1883        | 0.0520            | -0.0588           | 1.1311 | 0.2992               |
| U1-O7  | 0.0644              | 0.1969         | 0.1460        | 0.0591            | -0.0690           | 1.1672 | 0.3591               |
| U1-O8  | 0.0602              | 0.1883         | 0.1474        | 0.0554            | -0.0637           | 1.1500 | 0.3324               |
| Ag1-O2 | 0.0340              | 0.1497         | 0.0220        | 0.0381            | -0.0389           | 1.0188 | 0.2143               |
| Ag1-O3 | 0.0319              | 0.1396         | 0.0509        | 0.0358            | -0.0366           | 1.0243 | 0.1837               |
| Ag1-O8 | 0.0395              | 0.1800         | 0.0291        | 0.0469            | -0.0488           | 1.0404 | 0.2248               |
| Ag1-I1 | 0.0520              | 0.1283         | 0.0332        | 0.0403            | -0.0510           | 1.2661 | 0.5593               |
| Ag1-I2 | 0.0557              | 0.1361         | 0.0179        | 0.0435            | -0.0558           | 1.2838 | 0.5941               |

**Table S12** Topological parameters of **2**.  $\rho_{\text{BCP}}$  = magnitude of electron density at the bond critical point;  $\nabla^2\rho$  = Laplacian of electron density at the bond critical point;  $\varepsilon$  = deviation from cylindrical symmetry of electron cloud;  $G(\mathbf{r}_b)$  = kinetic energy density of bond or non-covalent interaction;  $V(\mathbf{r}_b)$  = potential energy density of bond or non-covalent interaction;  $\delta_{\text{AB}}$  = delocalization index of bond or non-covalent interaction.

| Atoms  | $\rho_{\text{BCP}}$ | $\nabla^2\rho$ | $\varepsilon$ | $G(\mathbf{r}_b)$ | $V(\mathbf{r}_b)$ | $-V/G$ | $\delta_{\text{AB}}$ |
|--------|---------------------|----------------|---------------|-------------------|-------------------|--------|----------------------|
| U1-O1  | 0.3090              | 0.3156         | 0.0028        | 0.3588            | -0.6388           | 1.7802 | 1.8689               |
| U1-O2  | 0.3249              | 0.3007         | 0.0022        | 0.3846            | -0.6941           | 1.8046 | 1.8961               |
| U1-O3  | 0.0633              | 0.1902         | 0.1494        | 0.0572            | -0.0669           | 1.1691 | 0.3646               |
| U1-O4  | 0.0521              | 0.1720         | 0.1109        | 0.0484            | -0.0538           | 1.1115 | 0.2834               |
| U1-O5  | 0.0551              | 0.1762         | 0.1341        | 0.0505            | -0.0570           | 1.1278 | 0.3077               |
| U1-O6  | 0.0583              | 0.1813         | 0.1408        | 0.0530            | -0.0607           | 1.1451 | 0.3280               |
| U1-O7  | 0.0612              | 0.1885         | 0.1416        | 0.0559            | -0.0647           | 1.1571 | 0.3482               |
| U1-O8  | 0.0611              | 0.1887         | 0.1402        | 0.0559            | -0.0646           | 1.1556 | 0.3379               |
| Ag1-I1 | 0.0449              | 0.0999         | 0.0368        | 0.0312            | -0.0392           | 1.2562 | 0.5237               |
| Ag1-I3 | 0.0331              | 0.0763         | 0.0773        | 0.0219            | -0.0257           | 1.1766 | 0.3809               |
| Ag1-O4 | 0.0380              | 0.1689         | 0.0254        | 0.0438            | -0.0453           | 1.0352 | 0.2370               |
| Ag1-O5 | 0.0454              | 0.2104         | 0.0197        | 0.0551            | -0.0577           | 1.0459 | 0.2830               |
| I3-O2  | 0.0081              | 0.0284         | 0.0921        | 0.0056            | -0.0042           | 0.7507 | 0.0711               |
| O1-H5  | 0.0066              | 0.0259         | 0.3004        | 0.0051            | -0.0037           | 0.731  | 0.0222               |
| O1-H20 | 0.0063              | 0.0239         | 0.0796        | 0.0047            | -0.0035           | 0.7331 | 0.0268               |
| O2-H12 | 0.0073              | 0.0301         | 1.0094        | 0.006             | -0.0044           | 0.7341 | 0.0192               |
| O2-H13 | 0.0065              | 0.0249         | 0.0781        | 0.0049            | -0.0036           | 0.7263 | 0.029                |

**Table S13** Topological parameters of **3**.  $\rho_{\text{BCP}}$  = magnitude of electron density at the bond critical point;  $\nabla^2\rho$  = Laplacian of electron density at the bond critical point;  $\varepsilon$  = deviation from cylindrical symmetry of electron cloud;  $G(\mathbf{r}_b)$  = kinetic energy density of bond or non-covalent interaction;  $V(\mathbf{r}_b)$  = potential energy density of bond or non-covalent interaction;  $\delta_{\text{AB}}$  = delocalization index of bond or non-covalent interaction.

| Atoms  | $\rho_{\text{BCP}}$ | $\nabla^2\rho$ | $\varepsilon$ | $G(\mathbf{r}_b)$ | $V(\mathbf{r}_b)$ | $-V/G$ | $\delta_{\text{AB}}$ |
|--------|---------------------|----------------|---------------|-------------------|-------------------|--------|----------------------|
| U1-O1  | 0.3055              | 0.3181         | 0.0009        | 0.3526            | -0.6257           | 1.7745 | 1.8682               |
| U1-O2  | 0.2910              | 0.3252         | 0.0038        | 0.3287            | -0.5760           | 1.7526 | 1.8590               |
| U1-O3  | 0.0659              | 0.1996         | 0.1545        | 0.0605            | -0.0711           | 1.1748 | 0.3746               |
| U1-O4  | 0.0631              | 0.1940         | 0.1476        | 0.0580            | -0.0674           | 1.1632 | 0.3587               |
| U1-O5  | 0.0600              | 0.1873         | 0.1366        | 0.0551            | -0.0633           | 1.1496 | 0.3325               |
| U1-O6  | 0.0569              | 0.1819         | 0.1340        | 0.0525            | -0.0595           | 1.1333 | 0.3100               |
| U1-O7  | 0.0617              | 0.1933         | 0.1399        | 0.0570            | -0.0657           | 1.1520 | 0.3367               |
| U1-O8  | 0.0595              | 0.1843         | 0.1360        | 0.0542            | -0.0623           | 1.1500 | 0.3334               |
| Ag1-O2 | 0.0448              | 0.2013         | 0.0147        | 0.0529            | -0.0554           | 1.0482 | 0.2906               |
| Ag1-O6 | 0.0420              | 0.1912         | 0.0279        | 0.0500            | -0.0521           | 1.0434 | 0.2614               |
| Ag1-O7 | 0.0398              | 0.1817         | 0.0164        | 0.0472            | -0.0489           | 1.0370 | 0.2426               |
| Ag1-I1 | 0.0551              | 0.1214         | 0.0641        | 0.0399            | -0.0523           | 1.3105 | 0.6212               |
| U1-O1  | 0.3061              | 0.3049         | 0.0008        | 0.3499            | -0.6235           | 1.7822 | 1.8890               |
| U1-O2  | 0.2848              | 0.3652         | 0.0050        | 0.3296            | -0.5678           | 1.7230 | 1.7336               |
| U1-O3  | 0.0583              | 0.1750         | 0.1329        | 0.0516            | -0.0594           | 1.1521 | 0.3421               |
| U1-O4  | 0.0604              | 0.1847         | 0.1390        | 0.0547            | -0.0631           | 1.1553 | 0.3454               |
| U1-O5  | 0.0597              | 0.1831         | 0.1330        | 0.0540            | -0.0622           | 1.1520 | 0.3401               |
| U1-O6  | 0.0628              | 0.1874         | 0.1384        | 0.0563            | -0.0657           | 1.1671 | 0.3618               |
| U1-O7  | 0.0660              | 0.1991         | 0.1559        | 0.0604            | -0.0710           | 1.758  | 0.3763               |
| U1-O8  | 0.0632              | 0.1936         | 0.1505        | 0.0579            | -0.0674           | 1.1639 | 0.3598               |
| O1-H20 | 0.0048              | 0.0181         | 0.0967        | 0.0035            | -0.0025           | 0.7099 | 0.0216               |
| O2-H14 | 0.0044              | 0.0166         | 0.0495        | 0.0032            | -0.0023           | 0.7071 | 0.0193               |

**Table S14** Topological parameters of **4**.  $\rho_{\text{BCP}}$  = magnitude of electron density at the bond critical point;  $\nabla^2\rho$  = Laplacian of electron density at the bond critical point;  $\varepsilon$  = deviation from cylindrical symmetry of electron cloud;  $G(\mathbf{r}_b)$  = kinetic energy density of bond or non-covalent interaction;  $V(\mathbf{r}_b)$  = potential energy density of bond or non-covalent interaction;  $\delta_{\text{AB}}$  = delocalization index of bond or non-covalent interaction.

| Atoms  | $\rho_{\text{BCP}}$ | $\nabla^2\rho$ | $\varepsilon$ | $G(\mathbf{r}_b)$ | $V(\mathbf{r}_b)$ | $-V/G$ | $\delta_{\text{AB}}$ |
|--------|---------------------|----------------|---------------|-------------------|-------------------|--------|----------------------|
| U1-O1  | 0.3225              | 0.3002         | 0.0013        | 0.3800            | -0.6849           | 1.8026 | 1.8970               |
| U1-O2  | 0.3025              | 0.3193         | 0.0001        | 0.3479            | -0.6160           | 1.7706 | 1.8686               |
| U1-O5  | 0.0634              | 0.1942         | 0.1477        | 0.0581            | -0.0677           | 1.1646 | 0.3577               |
| U1-O6  | 0.0596              | 0.1829         | 0.1385        | 0.0541            | -0.0624           | 1.1538 | 0.3397               |
| U1-O7  | 0.0613              | 0.1901         | 0.1455        | 0.0562            | -0.0650           | 1.1551 | 0.3417               |
| U1-O8  | 0.0609              | 0.1896         | 0.1325        | 0.0560            | -0.0645           | 1.1526 | 0.3372               |
| U1-O9  | 0.0534              | 0.1707         | 0.1233        | 0.0486            | -0.0546           | 1.1223 | 0.2962               |
| U1-O10 | 0.0580              | 0.1808         | 0.1255        | 0.0528            | -0.0605           | 1.1444 | 0.3256               |
| Ag1-O8 | 0.0257              | 0.1109         | 0.0235        | 0.0278            | -0.0278           | 1.0014 | 0.1510               |
| Ag1-O9 | 0.0418              | 0.1950         | 0.0155        | 0.0508            | -0.0528           | 1.0397 | 0.2526               |
| Ag1-I1 | 0.0454              | 0.1089         | 0.0699        | 0.0335            | -0.0415           | 1.2403 | 0.5412               |
| Ag1-I3 | 0.0386              | 0.0991         | 0.0886        | 0.0289            | -0.0343           | 1.1895 | 0.4231               |
| Ag1-I5 | 0.0404              | 0.1047         | 0.0936        | 0.0307            | -0.0367           | 1.1967 | 0.4213               |
| U1-O1  | 0.3242              | 0.2971         | 0.0016        | 0.3821            | -0.6900           | 1.8057 | 1.8992               |
| U1-O2  | 0.3011              | 0.3227         | 0.0062        | 0.3467            | -0.6127           | 1.7674 | 1.8100               |
| U1-O5  | 0.0581              | 0.1798         | 0.1388        | 0.0526            | -0.0602           | 1.1452 | 0.3327               |
| U1-O6  | 0.0589              | 0.1825         | 0.1353        | 0.0536            | -0.0616           | 1.1488 | 0.3330               |
| U1-O7  | 0.0662              | 0.2003         | 0.1582        | 0.0607            | -0.0713           | 1.1752 | 0.3727               |
| U1-O8  | 0.0618              | 0.1859         | 0.1346        | 0.0556            | -0.0647           | 1.1639 | 0.3540               |
| U1-O9  | 0.0574              | 0.1802         | 0.1237        | 0.0524            | -0.0598           | 1.1406 | 0.3227               |
| U1-O10 | 0.0543              | 0.1649         | 0.1260        | 0.0478            | -0.0543           | 1.1372 | 0.3203               |
| I3-O2  | 0.0072              | 0.0277         | 0.2968        | 0.0053            | -0.0038           | 0.7253 | 0.0611               |
| I5-O2  | 0.0135              | 0.0534         | 0.0853        | 0.0109            | -0.0091           | 0.8339 | 0.1084               |

## II. Powder X-ray diffraction data

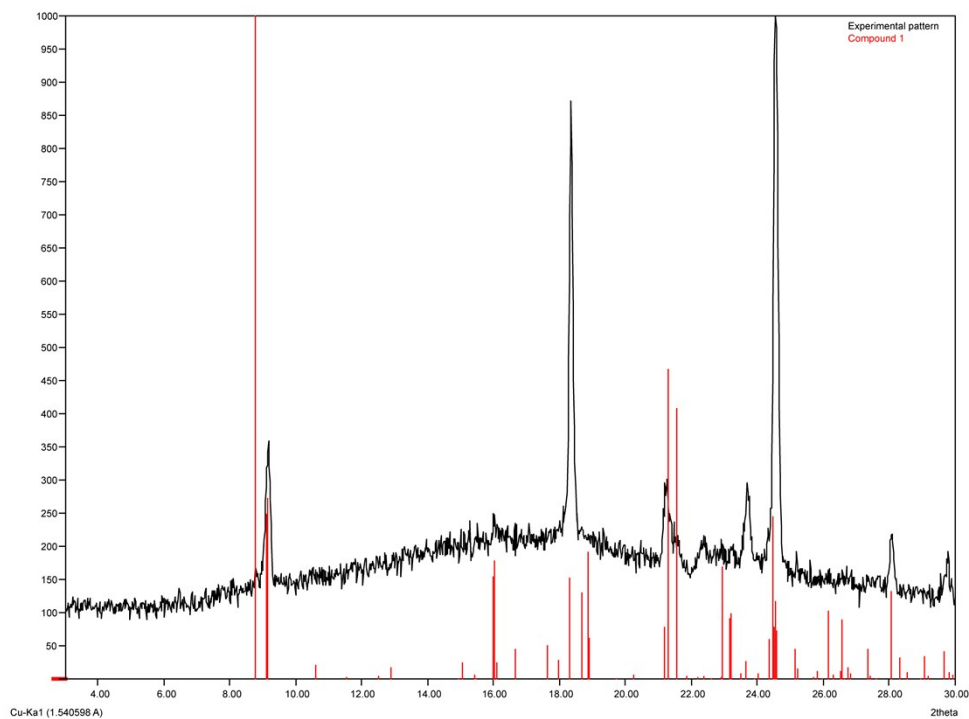

**Figure S5** The observed PXRD pattern of **1** with calculated pattern overlaid in red.

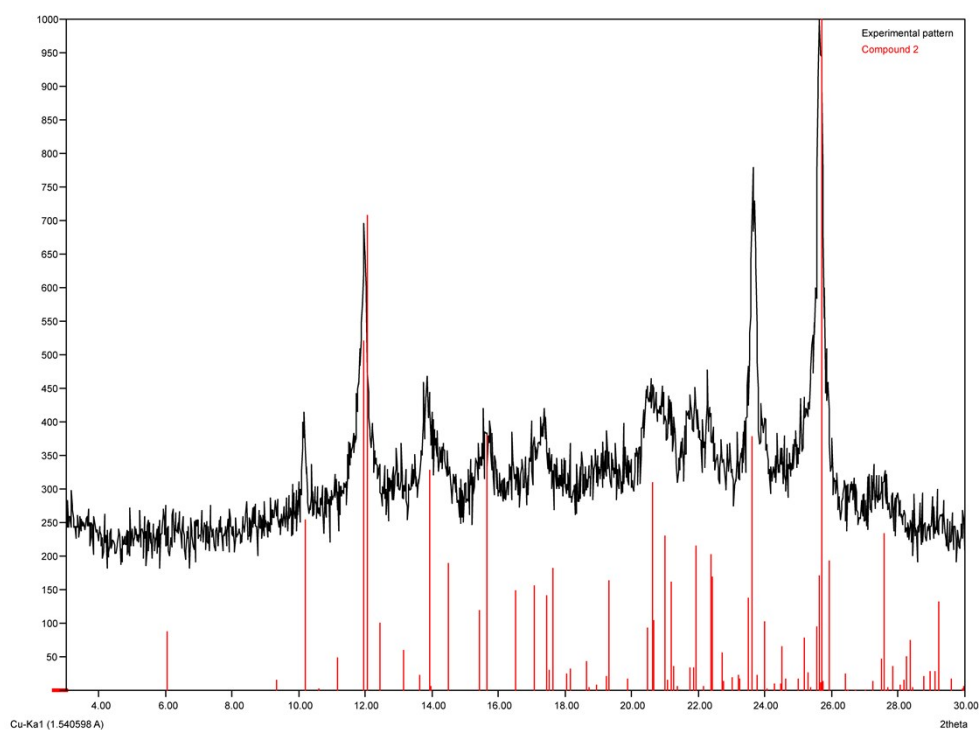

**Figure S6** The observed PXRD pattern of **2** with calculated pattern overlaid in red.

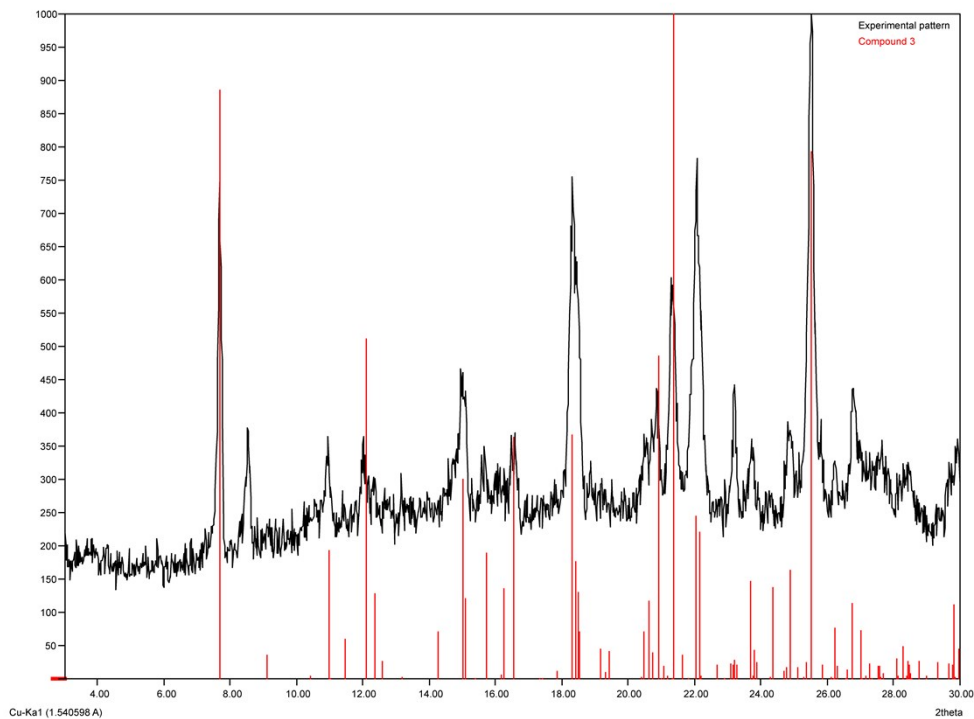

**Figure S7** The observed PXRD pattern of **3** with calculated pattern overlaid in red. We acknowledge one unidentified impurity at ca. 8.5 degrees 2-theta.

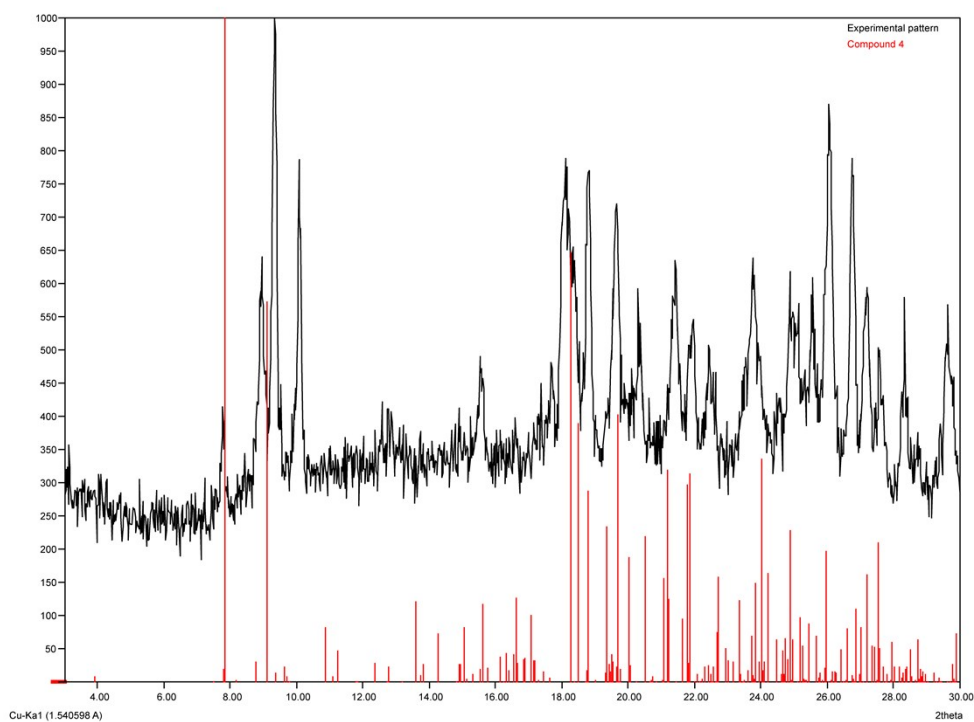

**Figure S8** The observed PXRD pattern of **4** with calculated pattern overlaid in red. We acknowledge one unidentified impurity at ca. 10 degrees 2-theta.

### III. Thermal Ellipsoid Plots

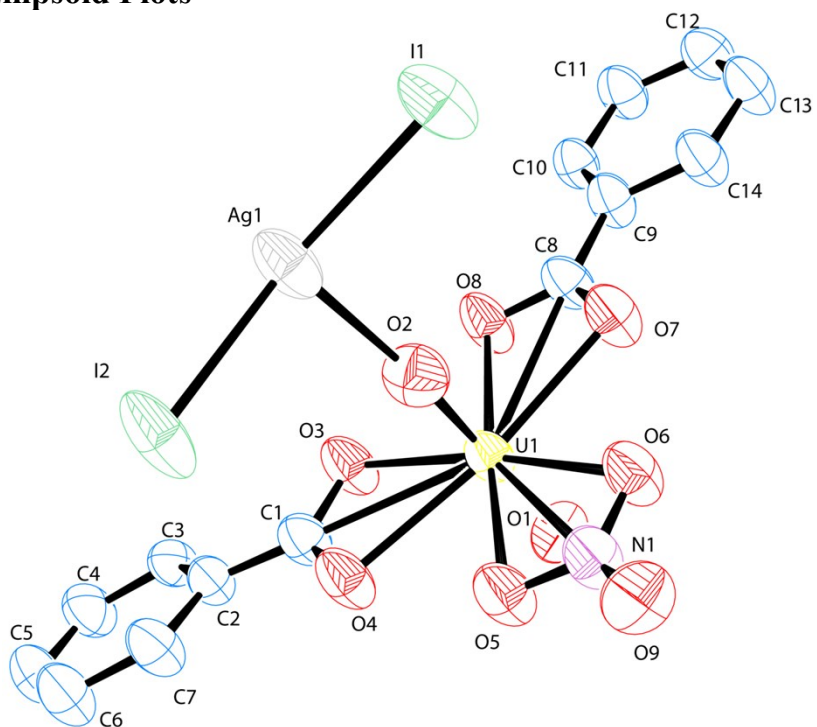

**Figure S9** ORTEP illustration of 1. Ellipsoids are shown at 50% probability level.

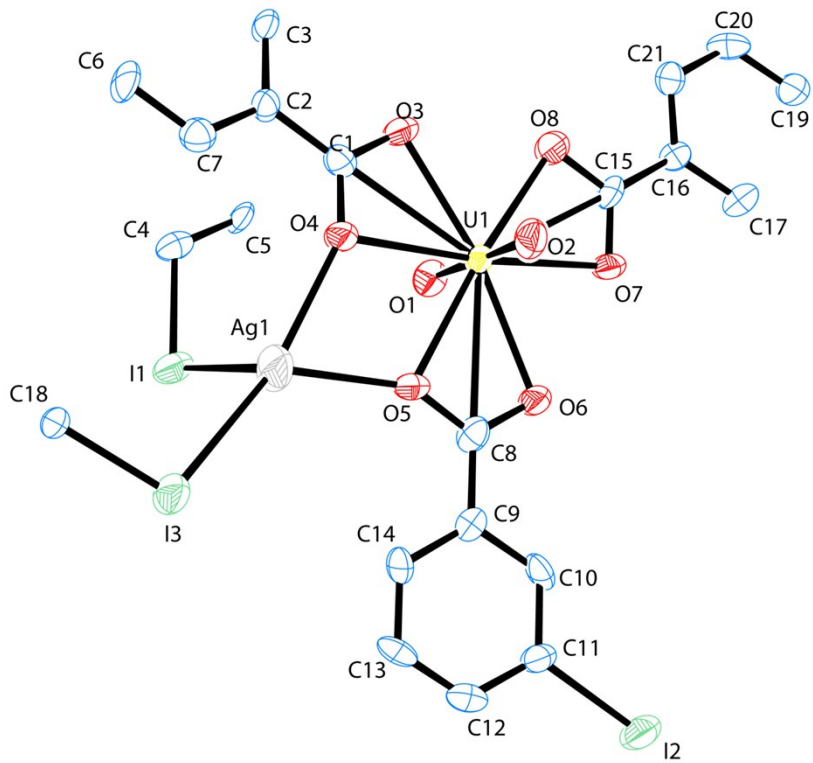

**Figure S10** ORTEP illustration of 2. Ellipsoids are shown at 50% probability level.

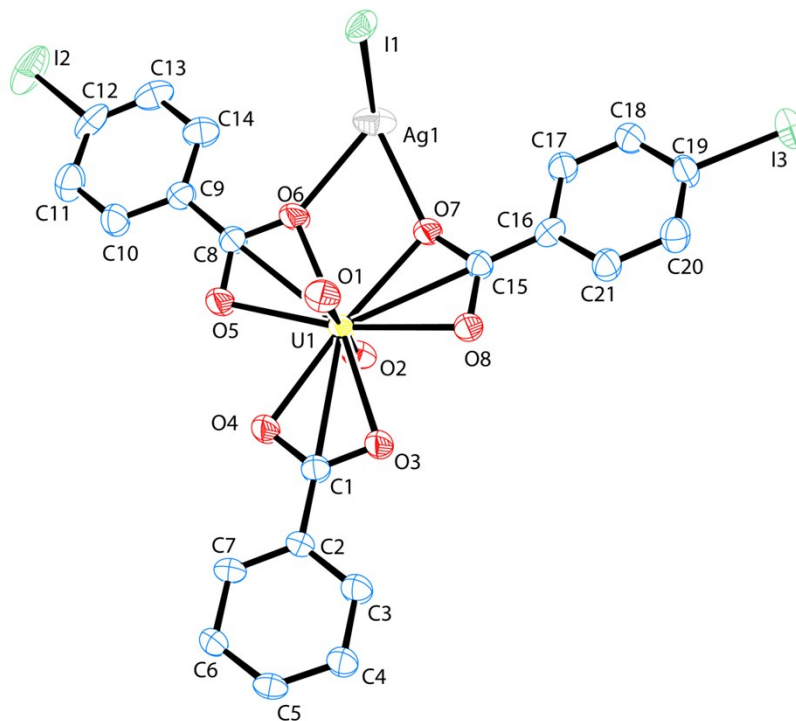

**Figure S11** ORTEP illustration of **3**. Ellipsoids are shown at 50% probability level.

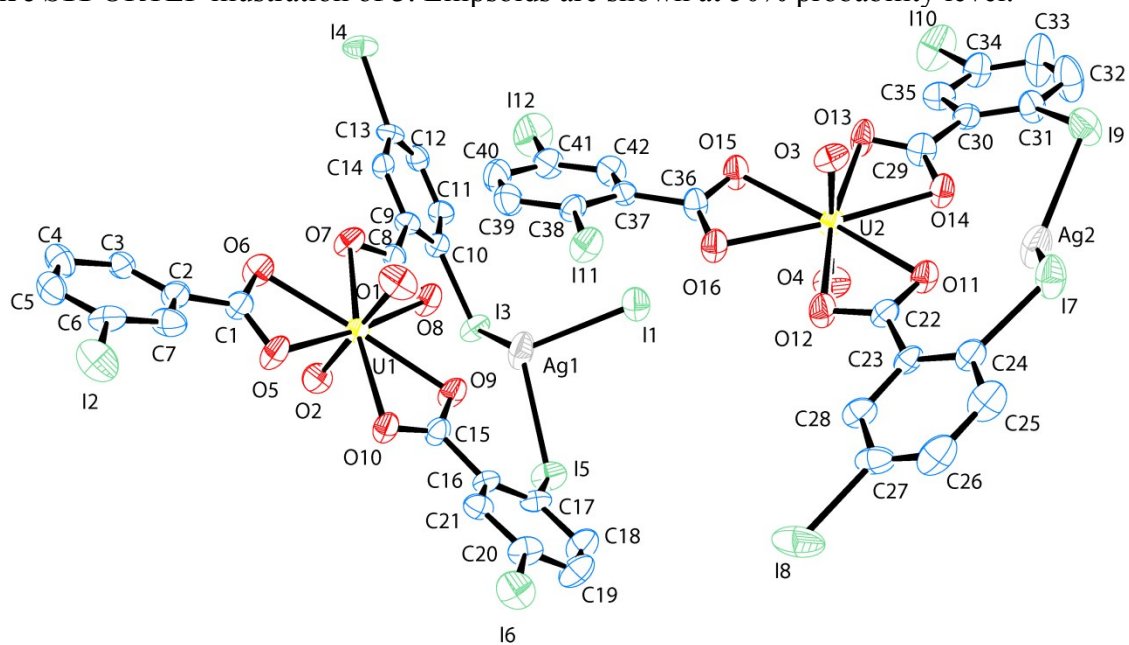

**Figure S12** ORTEP illustration of **4**. Ellipsoids are shown at 50% probability level.



#### IV. Tables of Bond Distances

**Table S15** U-O equatorial bond lengths in **1-4**.

| <b>Com-<br/>pound</b> | $d_{U1-O3}$<br>[Å] | $d_{U1-O4}$<br>[Å] | $d_{U1-O5}$<br>[Å] | $d_{U1-O6}$<br>[Å] | $d_{U1-O7}$<br>[Å] | $d_{U1-O8}$<br>[Å] | $d_{U1-O9}$<br>[Å] | $d_{U1-O10}$<br>[Å] |
|-----------------------|--------------------|--------------------|--------------------|--------------------|--------------------|--------------------|--------------------|---------------------|
| <b>1</b>              | 2.458<br>(6)       | 2.433<br>(6)       | 2.485<br>(6)       | 2.482<br>(6)       | 2.443<br>(6)       | 2.451<br>(6)       |                    |                     |
| <b>2</b>              | 2.454<br>(6)       | 2.514<br>(6)       | 2.494<br>(6)       | 2.474<br>(6)       | 2.455<br>(6)       | 2.444<br>(6)       |                    |                     |
| <b>3</b>              | 2.441<br>(4)       | 2.423<br>(4)       | 2.466<br>(4)       | 2.446<br>(4)       | 2.479<br>(4)       | 2.460<br>(4)       |                    |                     |
| <b>4</b>              |                    |                    | 2.422<br>(5)       | 2.471<br>(5)       | 2.475<br>(5)       | 2.511<br>(5)       | 2.454<br>(5)       | 2.481<br>(5)        |

**Table S16** Additional U-O equatorial bond lengths in **4**.

| <b>Compound</b> | $d_{U2-O11}$<br>[Å] | $d_{U2-O12}$<br>[Å] | $d_{U2-O13}$<br>[Å] | $d_{U2-O14}$<br>[Å] | $d_{U2-O15}$<br>[Å] | $d_{U2-O16}$<br>[Å] |
|-----------------|---------------------|---------------------|---------------------|---------------------|---------------------|---------------------|
| <b>4</b>        | 2.509<br>(5)        | 2.451<br>(5)        | 2.477<br>(5)        | 2.454<br>(5)        | 2.439<br>(5)        | 2.467<br>(5)        |

**Table S17** Ag-O bond lengths in **1-4**.

| <b>Com-<br/>pound</b> | $d_{Ag1-O2}$<br>[Å] | $d_{Ag1-O3}$<br>[Å] | $d_{Ag1-O4}$<br>[Å] | $d_{Ag1-O5}$<br>[Å] | $d_{Ag1-O6}$<br>[Å] | $d_{Ag1-O7}$<br>[Å] | $d_{Ag1-O8}$<br>[Å] | $d_{Ag1-O9}$<br>[Å] | $d_{Ag2-O11}$<br>[Å] | $d_{Ag2-O14}$<br>[Å] |
|-----------------------|---------------------|---------------------|---------------------|---------------------|---------------------|---------------------|---------------------|---------------------|----------------------|----------------------|
| <b>1</b>              | 2.464<br>(7)        | 2.403<br>(6)        |                     |                     |                     |                     | 2.500<br>(6)        |                     |                      |                      |
| <b>2</b>              |                     |                     | 2.413<br>(6)        | 2.339<br>(6)        |                     |                     |                     |                     |                      |                      |
| <b>3</b>              | 2.343<br>(4)        |                     |                     |                     | 2.397<br>(4)        | 2.375<br>(4)        |                     |                     |                      |                      |
| <b>4</b>              |                     |                     |                     |                     |                     |                     | 2.368<br>(5)        | 2.632<br>(6)        | 2.375<br>(5)         | 2.594<br>(5)         |

**Table S18** Ag-I Bond Lengths in **1-4**.

| <b>Compound</b> | $d_{\text{Ag1-11}}$<br>[Å] | $d_{\text{Ag1-12}}$<br>[Å] | $d_{\text{Ag1-13}}$<br>[Å] | $d_{\text{Ag1-15}}$<br>[Å] | $d_{\text{Ag2-17}}$<br>[Å] | $d_{\text{Ag2-19}}$<br>[Å] | $d_{\text{Ag2-111}}$<br>[Å] |
|-----------------|----------------------------|----------------------------|----------------------------|----------------------------|----------------------------|----------------------------|-----------------------------|
| <b>1</b>        | 2.7213<br>(10)             | 2.6848<br>(10)             |                            |                            |                            |                            |                             |
| <b>2</b>        | 2.9750<br>(15)             |                            | 2.820<br>(2)               |                            |                            |                            |                             |
| <b>3</b>        | 2.7000<br>(7)              |                            |                            |                            |                            |                            |                             |
| <b>4</b>        | 2.7799<br>(14)             |                            | 2.8754<br>(15)             | 2.8734<br>(10)             | 2.8815<br>(12)             | 2.8540<br>(9)              | 2.8097<br>(17)              |

## V. DFT Computed Structure Coordinates

**Table S19** Crystallographically-derived Cartesian coordinates for model structure of **1**. All units are in Angstroms.

|    |           |           |           |
|----|-----------|-----------|-----------|
| U  | 9.623979  | -3.302818 | 16.883611 |
| I  | 11.817359 | -3.568341 | 11.71316  |
| Ag | 5.636002  | -2.861406 | 15.63745  |
| I  | 11.460284 | 1.014143  | 13.799418 |
| O  | 7.958295  | -3.048455 | 16.439999 |
| O  | 11.292593 | -3.548604 | 17.337095 |
| O  | 10.223654 | -1.215482 | 15.74516  |
| O  | 10.273491 | -3.59107  | 14.529676 |
| O  | 9.667102  | -1.050614 | 17.82774  |
| O  | 9.569531  | -5.350872 | 15.571934 |
| O  | 8.930819  | -3.408355 | 19.263869 |
| O  | 8.904519  | -5.27866  | 18.208063 |
| C  | 10.07581  | -5.654612 | 13.290967 |
| C  | 10.082319 | -0.50152  | 16.778708 |
| C  | 10.913558 | 1.705265  | 15.730644 |
| C  | 10.759331 | -5.352736 | 12.109354 |
| C  | 9.975973  | -4.833315 | 14.496773 |
| C  | 10.39065  | 0.950114  | 16.774837 |
| C  | 11.162536 | 3.0493    | 15.874837 |
| H  | 11.497407 | 3.534335  | 15.155805 |
| C  | 9.427544  | -6.890717 | 13.33258  |
| H  | 8.952284  | -7.120277 | 14.098063 |
| C  | 10.416888 | 2.966918  | 18.111289 |
| H  | 10.260188 | 3.3897    | 18.92516  |
| C  | 10.823148 | -6.276895 | 11.068064 |
| H  | 11.307132 | -6.074412 | 10.299677 |
| C  | 10.142373 | 1.648367  | 17.972902 |
| H  | 9.777472  | 1.18803   | 18.692902 |
| C  | 10.18117  | -7.474985 | 11.165806 |
| H  | 10.23132  | -8.085408 | 10.466128 |
| O  | 8.176927  | -5.179031 | 20.267418 |
| C  | 9.467062  | -7.78143  | 12.28258  |
| H  | 9.006863  | -8.58805  | 12.337741 |
| N  | 8.647755  | -4.656969 | 19.294837 |
| C  | 10.923127 | 3.679999  | 17.062257 |
| H  | 11.102525 | 4.5872    | 17.156128 |
| U  | 6.997341  | -1.155799 | 12.148644 |
| I  | 4.803961  | -0.890276 | 17.319095 |

|    |           |           |           |
|----|-----------|-----------|-----------|
| Ag | 10.985318 | -1.59721  | 13.394805 |
| I  | 5.161036  | -5.47276  | 15.232837 |
| O  | 8.663025  | -1.410161 | 12.592257 |
| O  | 5.328727  | -0.910012 | 11.69516  |
| O  | 6.397666  | -3.243135 | 13.287096 |
| O  | 6.347829  | -0.867546 | 14.502579 |
| O  | 6.954218  | -3.408003 | 11.204515 |
| O  | 7.051788  | 0.892256  | 13.460321 |
| O  | 7.6905    | -1.050262 | 9.768386  |
| O  | 7.716801  | 0.820044  | 10.824193 |
| C  | 6.54551   | 1.195995  | 15.741289 |
| C  | 6.539     | -3.957096 | 12.253547 |
| C  | 5.707762  | -6.163881 | 13.301612 |
| C  | 5.861989  | 0.894119  | 16.922902 |
| C  | 6.645346  | 0.374699  | 14.535483 |
| C  | 6.23067   | -5.408731 | 12.257418 |
| C  | 5.458783  | -7.507916 | 13.157418 |
| H  | 5.123913  | -7.992951 | 13.87645  |
| C  | 7.193776  | 2.432101  | 15.699676 |
| H  | 7.669036  | 2.66166   | 14.934192 |
| C  | 6.204432  | -7.425535 | 10.920967 |
| H  | 6.361132  | -7.848316 | 10.107096 |
| C  | 5.798172  | 1.818279  | 17.964192 |
| H  | 5.314188  | 1.615796  | 18.732579 |
| C  | 6.478947  | -6.106983 | 11.059354 |
| H  | 6.843847  | -5.646646 | 10.339354 |
| C  | 6.44015   | 3.016369  | 17.86645  |
| H  | 6.39      | 3.626791  | 18.566127 |
| O  | 8.444392  | 0.720415  | 8.764838  |
| C  | 7.154258  | 3.322813  | 16.749676 |
| H  | 7.614457  | 4.129433  | 16.694515 |
| N  | 7.973565  | 0.198352  | 9.737419  |
| C  | 5.698193  | -8.138616 | 11.969999 |
| H  | 5.518795  | -9.045816 | 11.876128 |

**Table S20** Crystallographically-derived Cartesian coordinates for model structure of **2**. All units are in Angstroms.

|   |           |           |           |
|---|-----------|-----------|-----------|
| U | 2.112768  | 2.492553  | 10.970928 |
| I | -2.798809 | 8.738135  | 12.285506 |
| I | -0.29451  | -3.363185 | 6.076995  |
| I | 6.553405  | 6.954114  | 16.070776 |

|    |           |           |           |
|----|-----------|-----------|-----------|
| Ag | 5.455416  | 0.167265  | 11.235278 |
| O  | 0.858815  | 4.559711  | 11.395646 |
| O  | 1.36192   | 1.748653  | 12.387145 |
| O  | 1.242415  | 0.703409  | 9.534206  |
| O  | -0.116579 | 3.049104  | 10.139064 |
| O  | 3.368726  | 3.985409  | 12.492593 |
| O  | 3.179256  | 0.277814  | 10.442226 |
| O  | 4.392646  | 2.135417  | 11.917025 |
| O  | 2.846273  | 3.215615  | 9.560568  |
| C  | 7.738809  | 4.452204  | 14.875412 |
| H  | 8.476379  | 4.72413   | 15.371894 |
| C  | 6.586046  | 5.202483  | 14.900309 |
| C  | -3.500493 | 5.443216  | 9.57082   |
| H  | -4.156511 | 5.215816  | 8.952781  |
| C  | 3.324965  | -3.492509 | 8.46948   |
| H  | 4.016694  | -4.097286 | 8.611541  |
| C  | 1.255482  | -1.676288 | 8.065265  |
| H  | 0.571149  | -1.065339 | 7.910023  |
| C  | 3.2926    | -2.274956 | 9.169534  |
| H  | 3.969632  | -2.066824 | 9.771463  |
| C  | -1.465337 | 6.210691  | 11.312167 |
| H  | -0.778495 | 6.490472  | 11.873089 |
| C  | 5.55439   | 3.657719  | 13.37425  |
| C  | -1.348329 | 5.020274  | 10.594539 |
| C  | 5.491829  | 4.819822  | 14.127028 |
| H  | 4.722684  | 5.341731  | 14.116776 |
| C  | 7.808066  | 3.312399  | 14.127028 |
| H  | 8.583072  | 2.797106  | 14.127028 |
| C  | 4.402241  | 3.258448  | 12.564356 |
| C  | 2.319439  | -3.781024 | 7.565854  |
| H  | 2.340514  | -4.570239 | 7.07523   |
| C  | 1.286114  | -2.888064 | 7.403289  |
| C  | 2.26503   | -1.394688 | 8.964497  |
| C  | -2.616911 | 6.974207  | 11.180358 |
| C  | -2.368075 | 4.621179  | 9.750959  |
| H  | -2.307855 | 3.810565  | 9.299878  |
| C  | -0.14914  | 4.166027  | 10.755639 |
| C  | -3.620898 | 6.589864  | 10.329456 |
| H  | -4.390265 | 7.108394  | 10.262086 |
| C  | 6.733951  | 2.937583  | 13.380109 |
| H  | 6.795913  | 2.171618  | 12.855801 |
| C  | 2.235743  | -0.066868 | 9.687984  |
| I  | 7.855966  | -0.875534 | 12.285506 |

|   |           |            |           |
|---|-----------|------------|-----------|
| I | 6.623759  | 0.778387   | 8.568483  |
| I | -0.821034 | -0.875534  | 12.285506 |
| O | 11.513589 | -5.053958  | 11.395646 |
| O | 10.538195 | -6.564565  | 10.139064 |
| C | 7.154281  | -4.170453  | 9.57082   |
| H | 6.498264  | -4.397853  | 8.952781  |
| C | 9.189438  | -3.402978  | 11.312167 |
| H | 9.876279  | -3.123197  | 11.873089 |
| C | 9.306446  | -4.593395  | 10.594539 |
| C | 8.037864  | -2.639462  | 11.180358 |
| C | 8.2867    | -4.99249   | 9.750959  |
| H | 8.34692   | -5.803104  | 9.299878  |
| C | 10.505635 | -5.447642  | 10.755639 |
| C | 7.033877  | -3.023805  | 10.329456 |
| H | 6.264509  | -2.505275  | 10.262086 |
| I | 4.12732   | -2.510041  | 13.22018  |
| O | 7.311998  | 0.458664   | 16.798363 |
| O | 6.288079  | 2.308656   | 17.37393  |
| C | 2.941916  | -0.008131  | 14.415544 |
| H | 2.204346  | -0.280057  | 13.919062 |
| C | 4.094679  | -0.75841   | 14.390647 |
| C | 5.126335  | 0.786354   | 15.916705 |
| C | 5.188896  | -0.375749  | 15.163928 |
| H | 5.95804   | -0.897658  | 15.17418  |
| C | 2.872658  | 1.131674   | 15.163928 |
| H | 2.097653  | 1.646967   | 15.163928 |
| C | 6.278484  | 1.185625   | 16.7266   |
| C | 3.946773  | 1.50649    | 15.910847 |
| H | 3.884812  | 2.272455   | 16.435155 |
| U | 4.090543  | -7.121116  | 10.970928 |
| I | 1.683265  | -12.976854 | 6.076995  |
| I | 8.53118   | -2.659555  | 16.070776 |
| O | 2.836589  | -5.053958  | 11.395646 |
| O | 3.339695  | -7.865016  | 12.387145 |
| O | 3.22019   | -8.91026   | 9.534206  |
| O | 1.861195  | -6.564565  | 10.139064 |
| O | 5.346501  | -5.62826   | 12.492593 |
| O | 5.157031  | -9.335855  | 10.442226 |
| O | 6.370421  | -7.478252  | 11.917025 |
| O | 4.824048  | -6.398054  | 9.560568  |
| C | 9.716583  | -5.161465  | 14.875412 |
| H | 10.454154 | -4.889539  | 15.371894 |
| C | 8.563821  | -4.411186  | 14.900309 |

|   |           |            |           |
|---|-----------|------------|-----------|
| C | -1.522719 | -4.170453  | 9.57082   |
| H | -2.178736 | -4.397853  | 8.952781  |
| C | 5.302739  | -13.106178 | 8.46948   |
| H | 5.994468  | -13.710955 | 8.611541  |
| C | 3.233257  | -11.289957 | 8.065265  |
| H | 2.548924  | -10.679008 | 7.910023  |
| C | 5.270374  | -11.888625 | 9.169534  |
| H | 5.947407  | -11.680493 | 9.771463  |
| C | 0.512438  | -3.402978  | 11.312167 |
| H | 1.199279  | -3.123197  | 11.873089 |
| C | 7.532164  | -5.95595   | 13.37425  |
| C | 0.629446  | -4.593395  | 10.594539 |
| C | 7.469604  | -4.793847  | 14.127028 |
| H | 6.700459  | -4.271938  | 14.116776 |
| C | 9.785841  | -6.30127   | 14.127028 |
| H | 10.560847 | -6.816563  | 14.127028 |
| C | 6.380015  | -6.355221  | 12.564356 |
| C | 4.297214  | -13.394693 | 7.565854  |
| H | 4.318289  | -14.183908 | 7.07523   |
| C | 3.263888  | -12.501733 | 7.403289  |
| C | 4.242805  | -11.008357 | 8.964497  |
| C | -0.639136 | -2.639462  | 11.180358 |
| C | -0.3903   | -4.99249   | 9.750959  |
| H | -0.33008  | -5.803104  | 9.299878  |
| C | 1.828635  | -5.447642  | 10.755639 |
| C | -1.643123 | -3.023805  | 10.329456 |
| H | -2.412491 | -2.505275  | 10.262086 |
| C | 8.711726  | -6.676086  | 13.380109 |
| H | 8.773687  | -7.442051  | 12.855801 |
| C | 4.213517  | -9.680537  | 9.687984  |
| O | 5.086835  | -3.288207  | 5.111272  |
| O | 3.149994  | -2.862612  | 4.203252  |
| C | 3.004285  | 0.907711   | 6.175998  |
| H | 2.312556  | 1.512488   | 6.033937  |
| C | 5.073767  | -0.90851   | 6.580213  |
| H | 5.7581    | -1.519459  | 6.735455  |
| C | 3.03665   | -0.309842  | 5.475944  |
| H | 2.359618  | -0.517974  | 4.874015  |
| C | 4.009811  | 1.196226   | 7.079624  |
| H | 3.988736  | 1.985441   | 7.570248  |
| C | 5.043136  | 0.303266   | 7.242189  |
| C | 4.06422   | -1.19011   | 5.680981  |
| C | 4.093507  | -2.51793   | 4.957494  |

**Table S21** Crystallographically-derived Cartesian coordinates for model structure of **3**. All units are in Angstroms.

|    |           |           |           |
|----|-----------|-----------|-----------|
| U  | 4.793659  | 0.980467  | 16.999788 |
| I  | 11.922144 | 5.51843   | 13.468784 |
| I  | 4.618352  | -8.230116 | 16.994362 |
| Ag | 1.389135  | -1.083674 | 17.743392 |
| I  | -2.552632 | 5.115323  | 20.554048 |
| O  | 3.745259  | -1.21647  | 17.47285  |
| O  | 4.155769  | 0.942014  | 15.346883 |
| O  | 5.722773  | -1.257925 | 16.57944  |
| O  | 3.440274  | 2.978995  | 17.50192  |
| O  | 2.472824  | 1.054941  | 17.769361 |
| O  | 5.396739  | 1.012058  | 18.688159 |
| O  | 6.020332  | 2.999007  | 16.457347 |
| O  | 7.098285  | 1.116408  | 16.207347 |
| C  | 9.351806  | 2.4358    | 15.104635 |
| H  | 9.394151  | 1.510939  | 15.19572  |
| C  | 4.719837  | -1.892605 | 16.99223  |
| C  | 7.06301   | 2.370045  | 16.093006 |
| C  | 1.121687  | 4.36843   | 18.403081 |
| H  | 1.811129  | 4.881606  | 18.050369 |
| C  | 10.330244 | 4.478498  | 14.405024 |
| C  | 4.60438   | -6.139531 | 16.926339 |
| C  | 8.176273  | 4.494222  | 15.41665  |
| H  | 7.429959  | 4.960226  | 15.717038 |
| C  | 8.215863  | 3.120511  | 15.534867 |
| C  | 0.030555  | 4.993104  | 18.982538 |
| H  | -0.025427 | 5.920823  | 19.011608 |
| C  | -0.944014 | 2.846055  | 19.436026 |
| H  | -1.652935 | 2.342885  | 19.765483 |
| C  | 1.195987  | 2.984712  | 18.34688  |
| C  | 9.235229  | 5.190369  | 14.852698 |
| H  | 9.20818   | 6.116659  | 14.779054 |
| C  | 5.646751  | -4.095403 | 16.282929 |
| H  | 6.33295   | -3.647982 | 15.843007 |
| C  | 3.610002  | -5.440525 | 17.577501 |
| H  | 2.927859  | -5.899381 | 18.011609 |
| C  | -0.974249 | 4.20976   | 19.517421 |
| C  | 0.154573  | 2.212804  | 18.854631 |
| H  | 0.190682  | 1.285085  | 18.80812  |
| C  | 2.418003  | 2.327161  | 17.848818 |
| C  | 4.66741   | -3.356372 | 16.941843 |



|   |           |           |           |
|---|-----------|-----------|-----------|
| C | 5.620338  | -5.464826 | 16.267425 |
| H | 6.281561  | -5.939406 | 15.817813 |
| C | 3.628964  | -4.063955 | 17.581377 |
| H | 2.94983   | -3.596521 | 18.011609 |
| C | 10.419916 | 3.120511  | 14.540682 |
| H | 11.18048  | 2.664513  | 14.259675 |
| I | -0.160956 | -1.62887  | 15.600953 |
| O | 1.130345  | -1.012058 | 20.071491 |
| U | 1.733424  | -0.980467 | 21.759861 |
| I | -5.395061 | -5.51843  | 25.290865 |
| I | 1.908731  | 8.230116  | 21.765287 |
| I | 9.079715  | -5.115323 | 18.205601 |
| O | 2.781825  | 1.21647   | 21.286799 |
| O | 2.371315  | -0.942014 | 23.412766 |
| O | 0.80431   | 1.257925  | 22.180209 |
| O | 3.086809  | -2.978995 | 21.25773  |
| O | 4.05426   | -1.054941 | 20.990288 |
| O | 0.506752  | -2.999007 | 22.302302 |
| O | -0.571202 | -1.116408 | 22.552302 |
| C | -2.824723 | -2.4358   | 23.655014 |
| H | -2.867067 | -1.510939 | 23.563929 |
| C | 1.807247  | 1.892605  | 21.767419 |
| C | -0.535926 | -2.370045 | 22.666643 |
| C | 5.405396  | -4.36843  | 20.356568 |
| H | 4.715955  | -4.881606 | 20.709281 |
| C | -3.80316  | -4.478498 | 24.354626 |
| C | 1.922704  | 6.139531  | 21.83331  |
| C | -1.649189 | -4.494222 | 23.342999 |
| H | -0.902875 | -4.960226 | 23.042611 |
| C | -1.688779 | -3.120511 | 23.224782 |
| C | 6.496528  | -4.993104 | 19.777111 |
| H | 6.55251   | -5.920823 | 19.748041 |
| C | 7.471098  | -2.846055 | 19.323623 |
| H | 8.180019  | -2.342885 | 18.994166 |
| C | 5.331097  | -2.984712 | 20.412769 |
| C | -2.708145 | -5.190369 | 23.906952 |
| H | -2.681096 | -6.116659 | 23.980595 |
| C | 0.880333  | 4.095403  | 22.476721 |
| H | 0.194134  | 3.647982  | 22.916643 |
| C | 2.917082  | 5.440525  | 21.182148 |
| H | 3.599225  | 5.899381  | 20.74804  |
| C | 7.501333  | -4.20976  | 19.242228 |
| C | 6.372511  | -2.212804 | 19.905018 |

|   |           |           |           |
|---|-----------|-----------|-----------|
| H | 6.336402  | -1.285085 | 19.951529 |
| C | 4.109081  | -2.327161 | 20.910831 |
| C | 1.859673  | 3.356372  | 21.817807 |
| C | 0.906745  | 5.464826  | 22.492224 |
| H | 0.245522  | 5.939406  | 22.941836 |
| C | 2.89812   | 4.063955  | 21.178272 |
| H | 3.577254  | 3.596521  | 20.74804  |
| C | -3.892833 | -3.120511 | 24.218967 |
| H | -4.653396 | -2.664513 | 24.499974 |
| O | 5.740856  | -4.148293 | 12.61239  |
| O | 4.662903  | -6.030892 | 12.86239  |
| C | 2.409382  | -4.7115   | 13.965102 |
| H | 2.367037  | -5.636361 | 13.874016 |
| C | 4.698178  | -4.777255 | 12.976731 |
| C | 1.430944  | -2.668802 | 14.664713 |
| C | 3.584915  | -2.653078 | 13.653086 |
| H | 4.331229  | -2.187074 | 13.352699 |
| C | 3.545325  | -4.026789 | 13.534869 |
| C | 2.525959  | -1.956931 | 14.217039 |
| H | 2.553008  | -1.030641 | 14.290683 |
| C | 1.341271  | -4.026789 | 14.529054 |
| H | 0.580708  | -4.482787 | 14.810062 |

**Table S22** Crystallographically-derived Cartesian coordinates for model structure of **4**. All units are in Angstroms.

|   |           |           |           |
|---|-----------|-----------|-----------|
| U | 14.657954 | 15.199538 | 17.089507 |
| I | 11.506884 | 18.616768 | 14.127904 |
| I | 15.110895 | 15.303711 | 9.162606  |
| I | 19.7927   | 15.010395 | 15.394626 |
| I | 11.351438 | 13.341941 | 23.955786 |
| I | 9.886701  | 17.486724 | 18.563903 |
| I | 20.024521 | 11.422412 | 21.355815 |
| O | 14.959331 | 15.403174 | 14.640571 |
| O | 16.94032  | 14.523382 | 16.42513  |
| O | 16.423704 | 14.389822 | 18.535583 |
| O | 12.427246 | 15.775185 | 17.933239 |
| O | 15.225514 | 16.865029 | 17.333142 |
| O | 13.889985 | 15.180701 | 19.448091 |
| O | 14.085943 | 13.563694 | 16.86565  |
| O | 13.043895 | 16.080809 | 15.380017 |
| C | 19.77699  | 13.974187 | 17.234249 |
| C | 9.735373  | 15.223506 | 22.201345 |

|    |           |           |           |
|----|-----------|-----------|-----------|
| H  | 9.103797  | 15.134308 | 22.877859 |
| C  | 19.929205 | 12.542182 | 19.591934 |
| C  | 17.271085 | 14.235252 | 17.598353 |
| C  | 18.618246 | 13.717336 | 17.948972 |
| C  | 10.944071 | 14.579758 | 22.300238 |
| C  | 14.272796 | 15.905547 | 12.01318  |
| H  | 14.866766 | 15.217476 | 12.206469 |
| C  | 13.553001 | 16.494718 | 13.049302 |
| C  | 11.908046 | 14.721046 | 21.324799 |
| H  | 12.733573 | 14.301269 | 21.416949 |
| C  | 13.866952 | 15.971511 | 14.422558 |
| C  | 18.733046 | 12.988454 | 19.135681 |
| H  | 17.965259 | 12.802615 | 19.625647 |
| C  | 11.639884 | 15.493838 | 20.198774 |
| C  | 14.124703 | 16.319385 | 10.70735  |
| C  | 12.683612 | 17.541201 | 12.743635 |
| C  | 21.084094 | 12.815894 | 18.883954 |
| H  | 21.908906 | 12.529221 | 19.203107 |
| C  | 12.575422 | 17.981827 | 11.440053 |
| H  | 11.99734  | 18.683847 | 11.244516 |
| C  | 10.428534 | 16.151449 | 20.090891 |
| C  | 13.302337 | 17.408491 | 10.424159 |
| H  | 13.244301 | 17.741667 | 9.556602  |
| C  | 21.003195 | 13.520042 | 17.699493 |
| H  | 21.774642 | 13.690305 | 17.209526 |
| C  | 12.731601 | 15.503833 | 19.137928 |
| C  | 9.45449   | 16.006484 | 21.091053 |
| H  | 8.63115   | 16.430798 | 21.010141 |
| U  | 20.329936 | 21.394234 | 16.722481 |
| I  | 25.446183 | 21.314373 | 18.353756 |
| I  | 17.136072 | 18.043484 | 19.854449 |
| I  | 15.661094 | 18.952843 | 15.157509 |
| I  | 21.273569 | 21.236221 | 24.496323 |
| I  | 25.826453 | 25.205238 | 12.600691 |
| Ag | 16.559614 | 19.873986 | 17.704887 |
| O  | 22.120851 | 22.124516 | 15.236173 |
| O  | 22.64562  | 21.974181 | 17.346627 |
| O  | 18.096287 | 20.856061 | 15.860993 |
| O  | 20.663134 | 21.167992 | 19.140176 |
| O  | 20.847719 | 19.716236 | 16.456595 |
| O  | 18.736238 | 20.481972 | 18.432196 |
| O  | 19.573569 | 21.380883 | 14.364122 |
| O  | 19.802256 | 23.044107 | 16.969038 |

|   |           |           |           |
|---|-----------|-----------|-----------|
| I | 17.061455 | 23.182933 | 9.827882  |
| C | 24.353338 | 22.691476 | 15.816042 |
| C | 19.306098 | 20.139611 | 20.767405 |
| C | 19.561425 | 20.6184   | 19.387407 |
| C | 18.429076 | 19.146113 | 21.156232 |
| C | 25.474038 | 22.479561 | 16.577963 |
| C | 22.970347 | 22.232184 | 16.159918 |
| C | 24.479373 | 23.463668 | 14.674285 |
| H | 23.732544 | 23.62785  | 14.146109 |
| C | 17.351339 | 21.046175 | 13.581973 |
| C | 20.118967 | 20.712944 | 21.751834 |
| H | 20.725135 | 21.378931 | 21.518089 |
| C | 25.70951  | 23.996131 | 14.305686 |
| C | 17.598555 | 21.827697 | 12.451453 |
| H | 18.396047 | 22.302848 | 12.379531 |
| C | 18.372719 | 18.717299 | 22.477794 |
| H | 17.776264 | 18.047035 | 22.72053  |
| C | 20.0271   | 20.295256 | 23.068901 |
| C | 16.159166 | 20.323515 | 13.631419 |
| C | 26.707821 | 23.003295 | 16.213859 |
| H | 27.455112 | 22.85118  | 16.748777 |
| C | 16.663617 | 21.895893 | 11.444548 |
| C | 18.4007   | 21.080343 | 14.660799 |
| C | 26.823267 | 23.745874 | 15.067607 |
| H | 27.652159 | 24.077227 | 14.80689  |
| C | 19.19196  | 19.277108 | 23.435253 |
| H | 19.177438 | 18.967211 | 24.311799 |
| C | 15.246345 | 20.411735 | 12.597544 |
| H | 14.447865 | 19.936667 | 12.644743 |
| C | 15.510301 | 21.191806 | 11.509728 |
| H | 14.896504 | 21.23838  | 10.810738 |
| I | 14.236183 | 21.314373 | 18.353756 |
| I | 14.616453 | 25.205238 | 12.600691 |
| O | 10.910851 | 22.124516 | 15.236173 |
| O | 11.43562  | 21.974181 | 17.346627 |
| C | 13.143338 | 22.691476 | 15.816042 |
| C | 14.264038 | 22.479561 | 16.577963 |
| C | 11.760347 | 22.232184 | 16.159918 |
| C | 13.269373 | 23.463668 | 14.674285 |
| H | 12.522544 | 23.62785  | 14.146109 |
| C | 14.49951  | 23.996131 | 14.305686 |
| C | 15.497821 | 23.003295 | 16.213859 |
| H | 16.245112 | 22.85118  | 16.748777 |

|   |           |           |           |
|---|-----------|-----------|-----------|
| C | 15.613267 | 23.745874 | 15.067607 |
| H | 16.442159 | 24.077227 | 14.80689  |

---

## VI. References

1. P. K. Khulbe, R. Ttripathi and H. D. Bist, Vibrational dynamics and phase transition in uranyl Nitrate Dihydrate (Dideuterate),  $\text{UO}_2(\text{NO}_3)_2 \cdot 2\text{H}_2\text{O}$  ( $2\text{D}_2\text{O}$ ) through Raman spectroscopy, *Journal of Physics and Chemistry of Solids*, 1992, **53**, 639-650.
2. G. Lu, T. Z. Forbes and A. J. Haes, Evaluating Best Practices in Raman Spectral Analysis for Uranium Speciation and Relative Abundance in Aqueous Solutions, *Analytical Chemistry*, 2016, **88**, 773-780.
